# Supplementary material for: Gender and Age Differences and the Trend in the Incidence and Prevalence of Dementia and Alzheimer’s Disease in Taiwan: A 7-Year National Population-Based Study
Source: Hindawi journal article supplement (doi:10.1155/2019/5378540), 2019-11-11
Supplement: f1 [file 5378540.f1.pdf]

## Supplementary Materials:

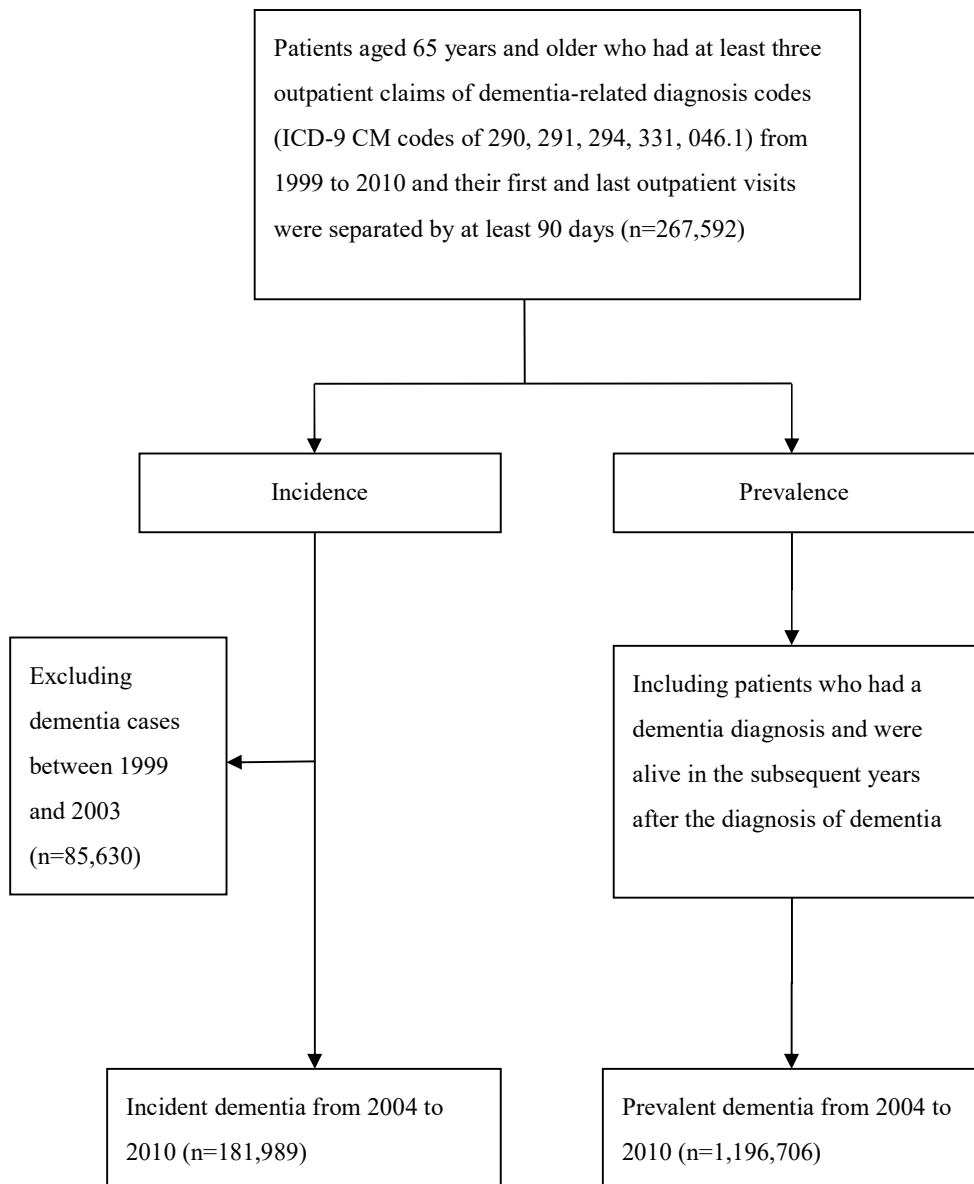

Figure S1: Flow chart for participant enrollment of the dementia study.

24

25

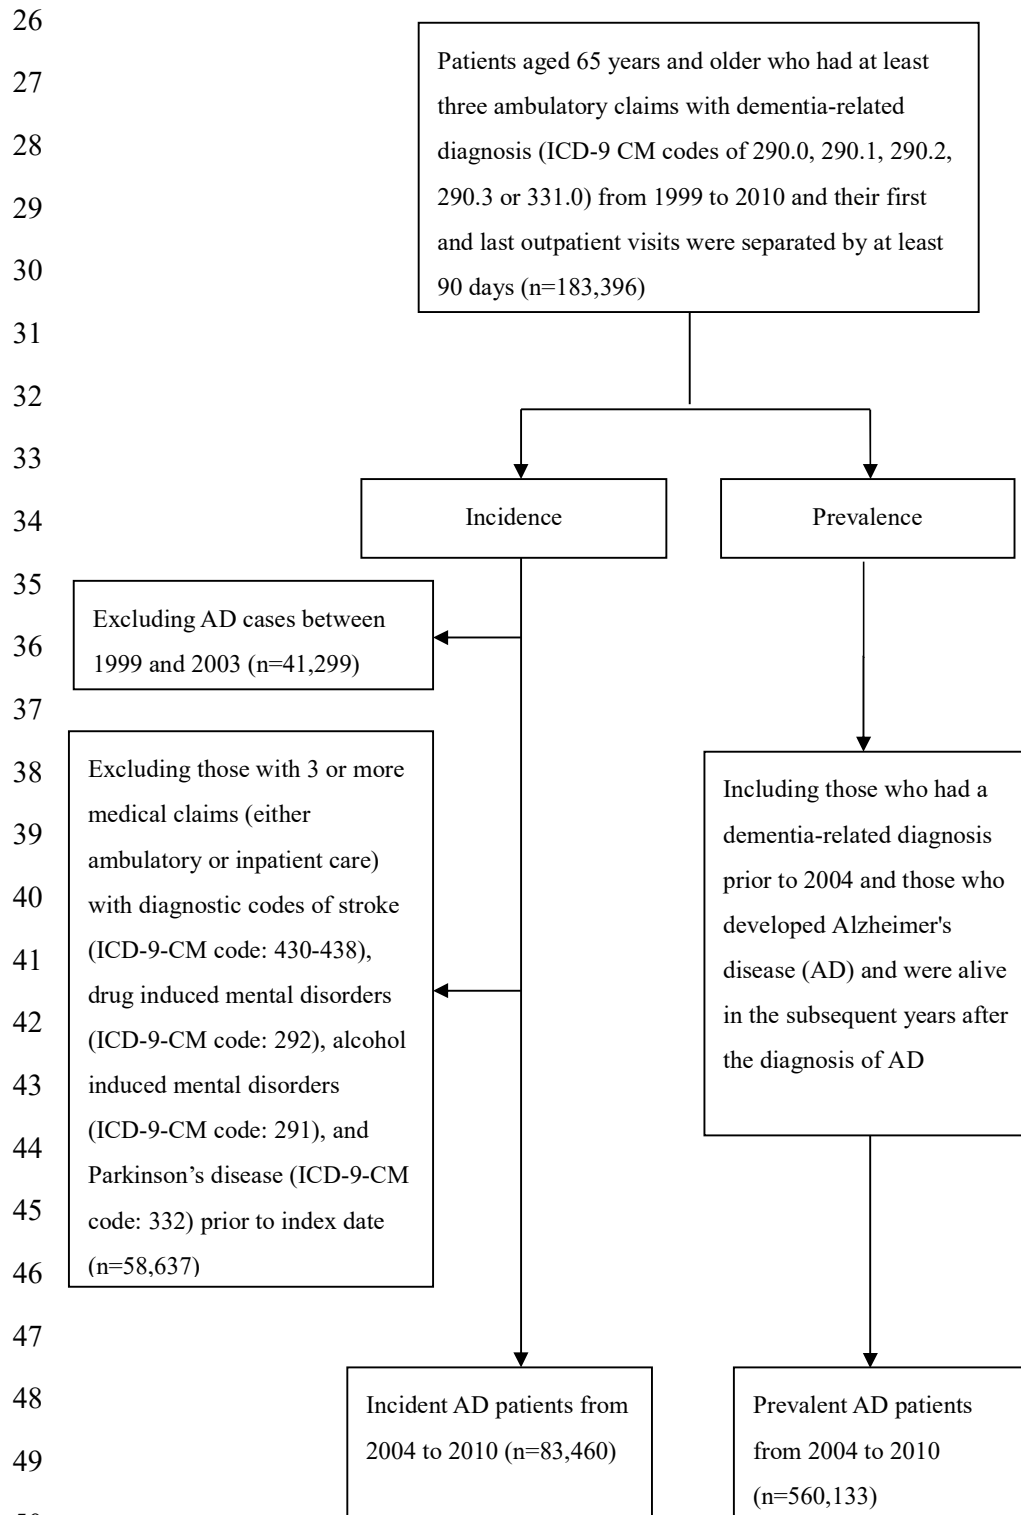

51 Figure S2: Flow chart for participant enrollment of the Alzheimer's disease (AD) study.

52

53

54
